# Supplementary material for: Ionic liquids as effective additives to enhance the solubility and permeation for puerarin and ferulic acid
Source: Royal Society of Chemistry journal article supplement (doi:10.1039/d1ra07080k), 2022-01-01
Supplement: d1ra07080k1.pdf [file d1ra07080k1.pdf]

# Ionic liquids as effective additives to enhance the solubility and permeation for puerarin and ferulic acid

Jing Yuan <sup>a,§,\*</sup> Ningning Zhou, <sup>b,§</sup> Jieyu Wu, <sup>b</sup> Tianxiang Yin, <sup>b,\*</sup> Yunbin Jia <sup>a,\*</sup>

<sup>a</sup> Shanghai Sixth People's Hospital, Shanghai 201306, China

<sup>b</sup> School of Chemistry and Molecular Engineering, East China University of Science and Technology, Shanghai 200237, China

\* Corresponding author. Address: Shanghai Sixth People's Hospital, Shanghai 201306, China. Tel.: +86 21 64252012. E-mail address: [yuanjing1323@163.com](mailto:yuanjing1323@163.com), [jiayunbin@foxmail.com](mailto:jiayunbin@foxmail.com)

\* Corresponding author. Address: School of Chemistry and Molecular Engineering, East China University of Science and Technology, Shanghai 200237, China. Tel.: +86 21 64252012; Fax: +86 21 64250804. E-mail address: [yintx@ecust.edu.cn](mailto:yintx@ecust.edu.cn)

§ These two authors contributed equally to this work.

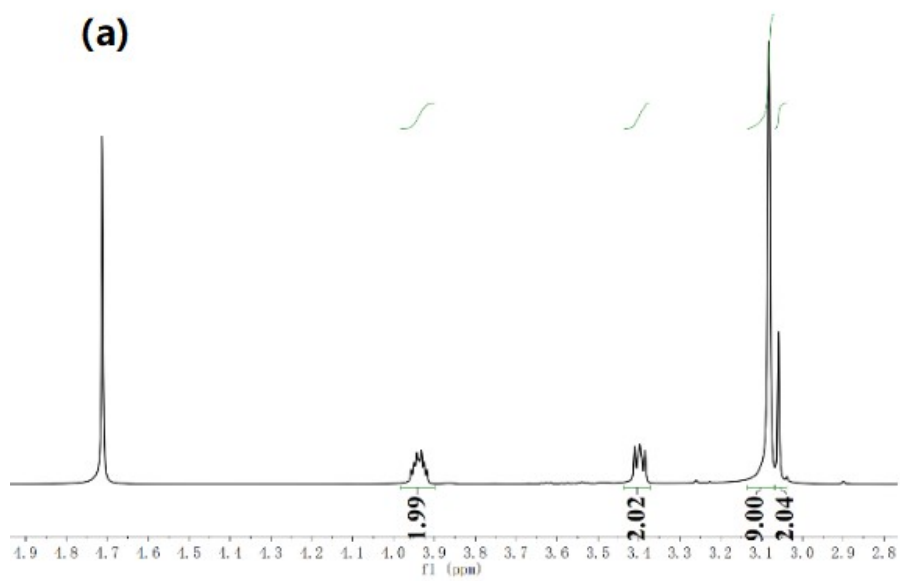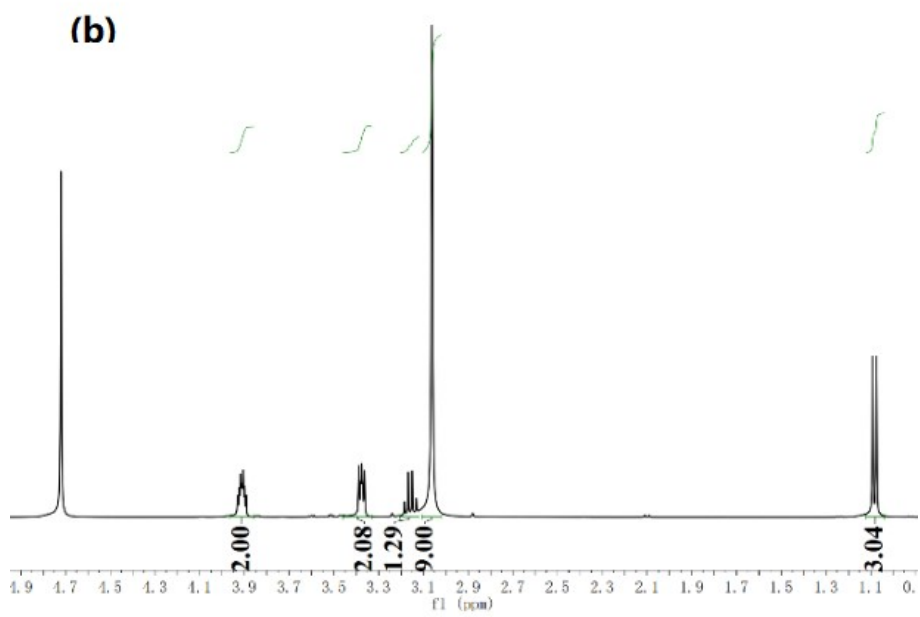

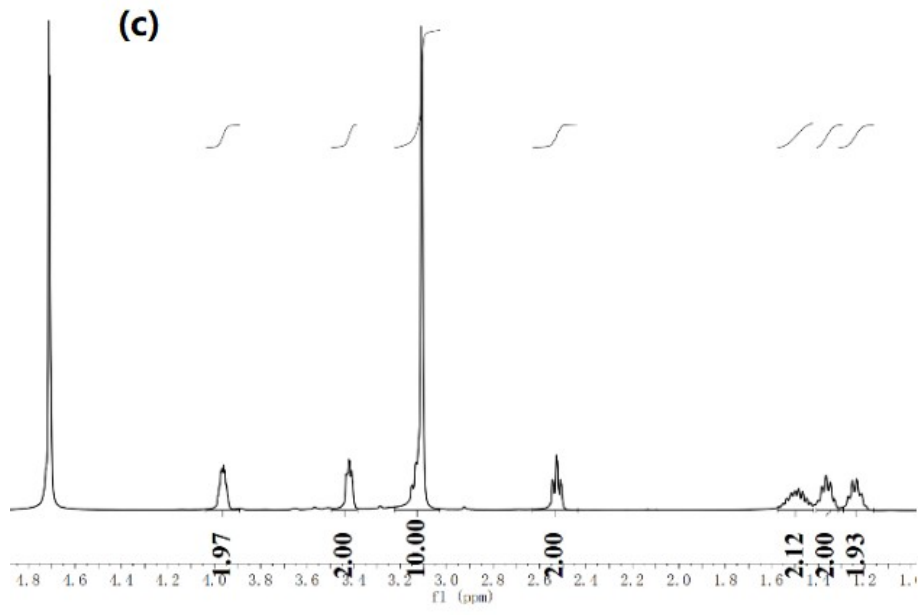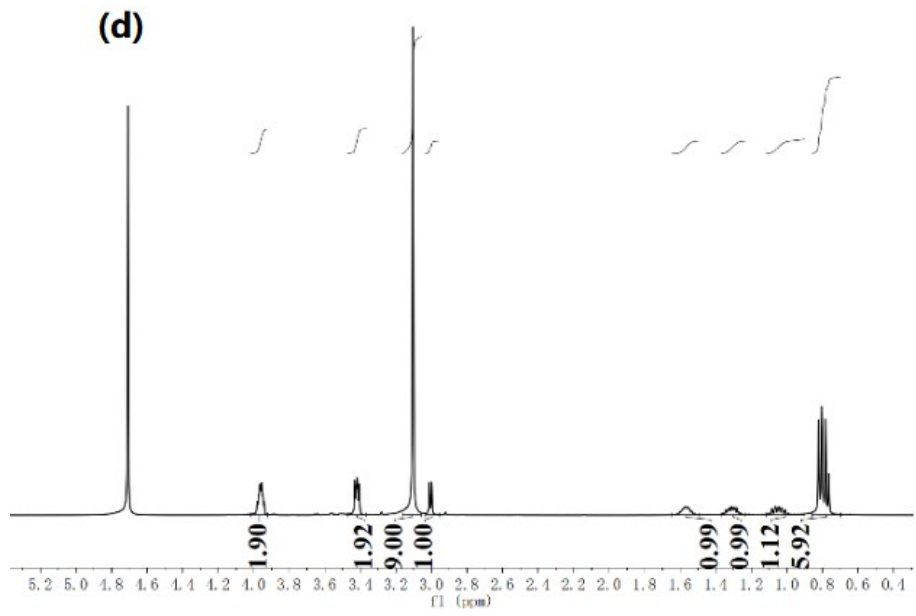

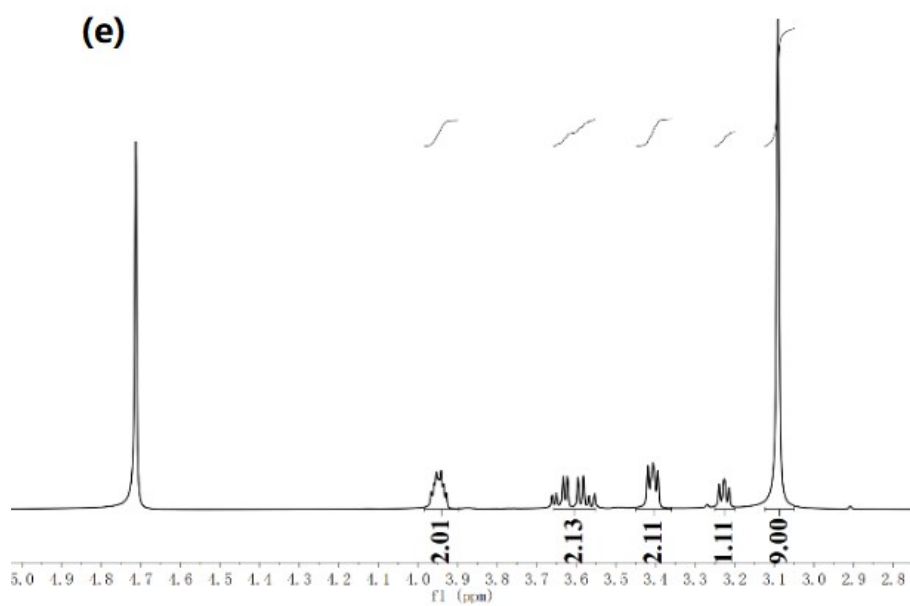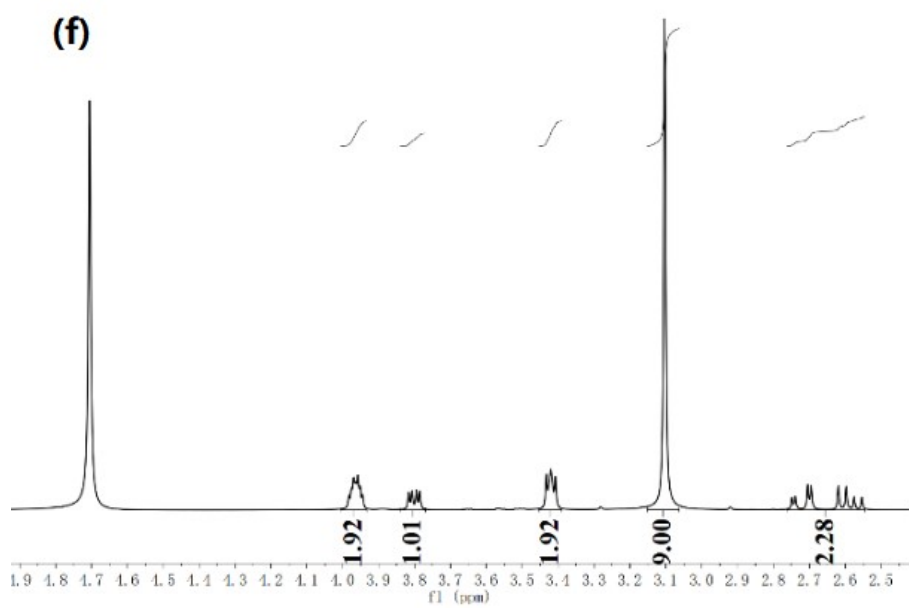

**Fig. S1**  $^1\text{H}$ NMR (400 MHz,  $\text{D}_2\text{O}$ ) spectra for CHAAILs: (a) [Ch][Gly], (b) [Ch][Ala], (c) [Ch][Lys], (d) [Ch][Ile], (e) [Ch][Ser], and (f) [Ch][Asp]

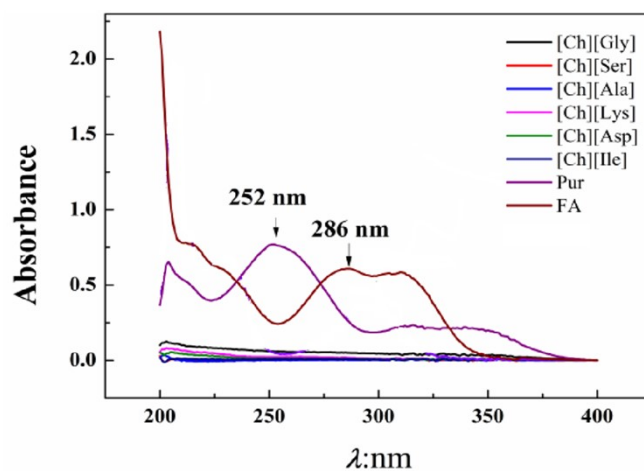

**Figure S2** UV-vis spectra of PBS solutions of APIs and CHAAILs. Pur and FA refer to puerarin and ferulic acid, respectively.

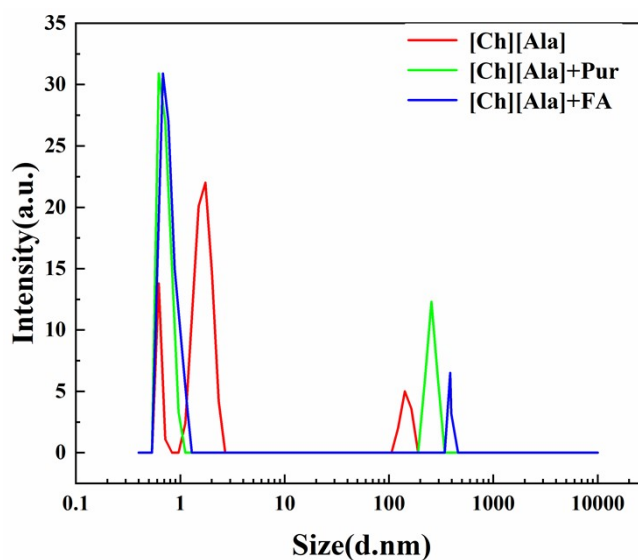

**Figure S3** DLS measurements on the solution of (a) ferulic acid and (b) puerarin in the absence and presence of [Ch][Ala]. Pur and FA refer to puerarin and ferulic acid, respectively.
